# Supplementary material for: Clinical Considerations for Patients Experiencing Acute Kidney Injury Following Percutaneous Nephrolithotomy
Source: MDPI journal article supplement (doi:10.3390/biomedicines11061712), 2023-06-14
Supplement: s1 [file s1]

## Supplementary Materials

**Table S1.** Detailed patient characteristics by AKI occurrence and trajectories.

|                                                         |               |                      | AKI                  |               |                      | Rapidly Reversed AKI    |                           |                      | P-AKI         |               |
|---------------------------------------------------------|---------------|----------------------|----------------------|---------------|----------------------|-------------------------|---------------------------|----------------------|---------------|---------------|
|                                                         | No AKI        | AKI                  | AKI Stage 1          | AKI Stage 2+  | Rapid Reversed AKI   | Mild Rapid Reversed AKI | Severe Rapid Reversed AKI | P-AKI                | Mild P-AKI    | Severe P-AKI  |
| Number of patients, n                                   | 254           | 93                   | 79                   | 18            | 71                   | 66                      | 5                         | 27                   | 15            | 13            |
| Number of encounters, n                                 | 313           | 104                  | 85                   | 19            | 75                   | 70                      | 5                         | 29                   | 15            | 14            |
| Demographic information                                 |               |                      |                      |               |                      |                         |                           |                      |               |               |
| Age, years, mean (SD)                                   | 53 (15)       | 58 (16) <sup>a</sup> | 58 (17) <sup>b</sup> | 55 (14)       | 59 (16) <sup>d</sup> | 58 (16) <sup>e</sup>    | 64 (7)                    | 54 (16)              | 57 (17)       | 51 (15)       |
| Sex, n (%)                                              |               |                      |                      |               |                      |                         |                           |                      |               |               |
| Female, n (%)                                           | 153 (49)      | 51 (49)              | 45 (53)              | 6 (32)        | 36 (48)              | 35 (50)                 | 1 (20)                    | 15 (52)              | 10 (67)       | 5 (36)        |
| Body Mass Index, median (IQR)                           | 29 (25, 33)   | 29 (24, 35)          | 29 (24, 35)          | 29 (25, 40)   | 28 (24, 34)          | 28 (24, 34)             | 28 (28, 29)               | 33 (27, 40)          | 33 (27, 39)   | 31 (25, 41)   |
| Race, n (%)                                             |               |                      |                      |               |                      |                         |                           |                      |               |               |
| African American                                        | 26 (8)        | 14 (13)              | 12 (14)              | 2 (11)        | 10 (13)              | 9 (13)                  | 1 (20)                    | 4 (14)               | 3 (20)        | 1 (7)         |
| Other                                                   | 53 (17)       | 10 (10)              | 8 (9)                | 2 (11)        | 8 (11)               | 7 (10)                  | 1 (20)                    | 2 (7)                | 1 (7)         | 1 (7)         |
| White                                                   | 234 (75)      | 80 (77)              | 65 (76)              | 15 (79)       | 57 (76)              | 54 (77)                 | 3 (60)                    | 23 (79)              | 11 (73)       | 12 (86)       |
| Ethnicity, n (%)                                        |               |                      |                      |               |                      |                         |                           |                      |               |               |
| Hispanic                                                | 19 (6)        | 6 (6)                | 5 (6)                | 1 (5)         | 5 (7)                | 5 (7)                   | 0 (0)                     | 1 (3)                | 0 (0)         | 1 (7)         |
| Marital Status, n (%)                                   |               |                      |                      |               |                      |                         |                           |                      |               |               |
| Married                                                 | 152 (49)      | 50 (48)              | 40 (47)              | 10 (53)       | 39 (52)              | 35 (50)                 | 4 (80)                    | 11 (38)              | 5 (33)        | 6 (43)        |
| Single                                                  | 122 (39)      | 37 (36)              | 29 (34)              | 8 (42)        | 22 (29)              | 21 (30)                 | 1 (20)                    | 15 (52)              | 8 (53)        | 7 (50)        |
| Divorced                                                | 34 (11)       | 17 (16)              | 16 (19)              | 1 (5)         | 14 (19)              | 14 (20)                 | 0 (0)                     | 3 (10)               | 2 (13)        | 1 (7)         |
| Native Language Spoken, n (%)                           |               |                      |                      |               |                      |                         |                           |                      |               |               |
| Non-English, n (%)                                      | 10 (3)        | 4 (4)                | 3 (4)                | 1 (5)         | 3 (4)                | 3 (4)                   | 0 (0)                     | 1 (3)                | 0 (0)         | 1 (7)         |
| Insurance paying the bills, n (%)                       |               |                      |                      |               |                      |                         |                           |                      |               |               |
| Medicare                                                | 109 (35)      | 60 (58) <sup>a</sup> | 49 (58) <sup>b</sup> | 11 (58)       | 44 (59) <sup>d</sup> | 42 (60) <sup>e</sup>    | 2 (40)                    | 16 (55) <sup>f</sup> | 7 (47)        | 9 (64)        |
| Private                                                 | 121 (39)      | 26 (25) <sup>a</sup> | 19 (22) <sup>b</sup> | 7 (37)        | 19 (25)              | 16 (23)                 | 3 (60)                    | 7 (24)               | 3 (20)        | 4 (29)        |
| Medicaid                                                | 53 (17)       | 12 (12)              | 12 (14)              | 0 (0)         | 9 (12)               | 9 (13)                  | 0 (0)                     | 3 (10)               | 3 (20)        | 0 (0)         |
| Uninsured                                               | 30 (10)       | 6 (6)                | 5 (6)                | 1 (5)         | 3 (4)                | 3 (4)                   | 0 (0)                     | 3 (10)               | 2 (13)        | 1 (7)         |
| Smoking Status, n (%)                                   |               |                      |                      |               |                      |                         |                           |                      |               |               |
| Never                                                   | 165 (53)      | 49 (47)              | 37 (44)              | 12 (63)       | 35 (47)              | 31 (44)                 | 4 (80)                    | 14 (48)              | 6 (40)        | 8 (57)        |
| Former                                                  | 76 (24)       | 37 (36)              | 31 (36) <sup>b</sup> | 6 (32)        | 26 (35)              | 25 (36)                 | 1 (20)                    | 11 (38)              | 6 (40)        | 5 (36)        |
| Current                                                 | 65 (21)       | 18 (17)              | 17 (20)              | 1 (5)         | 14 (19)              | 14 (20)                 | 0 (0)                     | 4 (14)               | 3 (20)        | 1 (7)         |
| Missing                                                 | 7 (2)         | 0 (0)                | 0 (0)                | 0 (0)         | 0 (0)                | 0 (0)                   | 0 (0)                     | 0 (0)                | 0 (0)         | 0 (0)         |
| Distance of residence to hospital, miles, mean (SD)     | 45 (49)       | 43 (32)              | 26 (19)              | 31 (21)       | 42 (30)              | 25 (18)                 | 36 (17)                   | 46 (36)              | 29 (22)       | 29 (22)       |
| Rural at patient residential area, n (%)                | 106 (34)      | 27 (26)              | 19 (22)              | 8 (42)        | 19 (25)              | 17 (24)                 | 2 (40)                    | 8 (28)               | 2 (13)        | 6 (43)        |
| Total population at patient residential area, mean (SD) | 17922 (11558) | 18802 (11119)        | 18867 (11205)        | 18510 (10725) | 18084 (10535)        | 18054 (10560)           | 18500 (10158)             | 20659 (12313)        | 22661 (13173) | 18514 (10920) |

|                                                                                              |                       |                                |                                |                       |                       |                       |                      |                                |                      |                       |
|----------------------------------------------------------------------------------------------|-----------------------|--------------------------------|--------------------------------|-----------------------|-----------------------|-----------------------|----------------------|--------------------------------|----------------------|-----------------------|
| Median total income at patient residential area, USD, mean (SD)                              | 41644 (11189)         | 40136 (10050)                  | 39755 (9836)                   | 41840 (10792)         | 39634 (9769)          | 39348 (9676)          | 43642 (10182)        | 41432 (10632)                  | 41652 (10341)        | 41197 (10930)         |
| Prevalence of residents living below poverty in patient residential area, %, mean (SD)       | 20.37 (8.51)          | 21.00 (9.18)                   | 21.56 (9.57)                   | 18.49 (6.60)          | 21.41 (9.68)          | 21.81 (9.82)          | 15.76 (4.31)         | 19.95 (7.65)                   | 20.39 (8.20)         | 19.47 (6.99)          |
| Prevalence of African American residents living below poverty at patient residential area, % | 0.18 (0.17)           | 0.19 (0.18)                    | 0.20 (0.19)                    | 0.16 (0.16)           | 0.19 (0.18)           | 0.20 (0.19)           | 0.15 (0.11)          | 0.18 (0.19)                    | 0.20 (0.20)          | 0.16 (0.17)           |
| Prevalence of Hispanic residents living below poverty at patient residential area, %         | 0.08 (0.08)           | 0.09 (0.06)                    | 0.09 (0.07)                    | 0.08 (0.04)           | 0.09 (0.06)           | 0.09 (0.06)           | 0.11 (0.05)          | 0.09 (0.06)                    | 0.09 (0.07)          | 0.08 (0.03)           |
| Time from Admission to Surgery, days, median (IQR)                                           | 0 (0, 0)              | 0 (0, 2)                       | 0 (0, 2)                       | 0 (0, 2) <sup>c</sup> | 0 (0, 2)              | 0 (0, 2)              | 0 (0, 0)             | 0 (0, 2)                       | 0 (0, 2)             | 0 (0, 6)              |
| Emergency admission                                                                          | 23 (7)                | 10 (10)                        | 7 (8)                          | 3 (16)                | 4 (5)                 | 4 (6)                 | 0 (0)                | 6 (21)                         | 3 (20)               | 3 (21)                |
| The admission happened at night                                                              | 121 (39)              | 40 (38)                        | 33 (39)                        | 7 (37)                | 25 (33)               | 24 (34)               | 1 (20)               | 15 (52)                        | 9 (60)               | 6 (43)                |
| Weekend admission                                                                            | 12 (4)                | 4 (4)                          | 4 (5)                          | 0 (0)                 | 4 (5)                 | 4 (6)                 | 0 (0)                | 0 (0)                          | 0 (0)                | 0 (0)                 |
| Transferred from another hospital                                                            | 7 (2)                 | 1 (1)                          | 1 (1)                          | 0 (0)                 | 1 (1)                 | 1 (1)                 | 0 (0)                | 0 (0)                          | 0 (0)                | 0 (0)                 |
| Reference estimated glomerular filtration rate, median (IQR)                                 | 84.93 (67.81, 103.32) | 85.70 (44.08, 103.43)          | 80.06 (44.08, 102.97)          | 92.88 (56.79, 103.23) | 79.72 (41.19, 102.69) | 79.89 (42.23, 104.60) | 36.03 (29.57, 62.51) | 92.60 (61.64, 103.23)          | 88.73 (58.42, 97.23) | 93.58 (67.81, 103.82) |
| CPT Code                                                                                     |                       |                                |                                |                       |                       |                       |                      |                                |                      |                       |
| 50080 - PCNL ≤ 2cm, n (%)                                                                    | 23 (7)                | 10 (10)                        | 8 (9)                          | 2 (11)                | 9 (12)                | 8 (11)                | 1 (20)               | 1 (3)                          | 0 (0)                | 1 (7)                 |
| SOFA score, median (IQR)                                                                     | 0.00 (0.00, 0.00)     | 0.00 (0.00, 5.00) <sup>a</sup> | 0.00 (0.00, 5.00) <sup>b</sup> | 0.00 (0.00, 2.00)     | 0.00 (0.00, 4.00)     | 0.00 (0.00, 4.00)     | 0.00 (0.00, 0.00)    | 0.00 (0.00, 8.00) <sup>g</sup> | 0.00 (0.00, 7.50)    | 0.00 (0.00, 7.50)     |
| ASA score, median (IQR)                                                                      | 3.00 (2.00, 3.00)     | 3.00 (3.00, 3.00) <sup>a</sup> | 3.00 (3.00, 3.00)              | 3.00 (3.00, 3.25)     | 3.00 (3.00, 3.00)     | 3.00 (3.00, 3.00)     | NA                   | 3.00 (3.00, 3.50)              | 3.00 (2.50, 3.50)    | 3.00 (3.00, 3.25)     |

<sup>a</sup>: Bonferroni adjusted p-value ≤ 0.05 for AKI vs No AKI comparison.

<sup>b</sup>: Bonferroni adjusted p-value ≤ 0.05 for AKI Stage 1 vs No AKI comparison.

<sup>c</sup>: Bonferroni adjusted p-value ≤ 0.05 for AKI Stage 2+ vs No AKI comparison.

<sup>d</sup>: Bonferroni adjusted p-values ≤ 0.05 for Rapidly Reversed AKI vs No AKI comparison.

<sup>e</sup>: Bonferroni adjusted p-values ≤ 0.05 for Mild Rapidly Reversed AKI vs No AKI comparison.

<sup>f</sup>: Bonferroni adjusted p-values ≤ 0.05 for Severe Rapidly Reversed AKI vs No AKI comparison.

<sup>g</sup>: Bonferroni adjusted p-values ≤ 0.05 for P-AKI vs No AKI comparison.

<sup>h</sup>: Bonferroni adjusted p-values ≤ 0.05 Mild P-AKI vs No AKI comparison.

<sup>i</sup>: Bonferroni adjusted p-values ≤ 0.05 for Severe P-AKI vs No AKI comparison.

Abbreviations: AKI, Acute kidney injury; ASA, American Society of Anesthesiology; CPT, Current Procedural Terminology; IQR, Interquartile range; P-AKI, Persistent acute kidney injury; PCNL, Percutaneous Nephrolithotomy; SD, standard deviation; SOFA, Sequential Organ Failure Assessment.

**Table S2.** Medical comorbidities with regard to AKI.

|                                          |          |                       | AKI                   |                       |                       | Rapidly Reversed AKI    |                           |                       | P-AKI      |                     |
|------------------------------------------|----------|-----------------------|-----------------------|-----------------------|-----------------------|-------------------------|---------------------------|-----------------------|------------|---------------------|
|                                          | No AKI   | AKI                   | AKI Stage 1           | AKI Stage 2+          | Rapid Reversed AKI    | Mild Rapid Reversed AKI | Severe Rapid Reversed AKI | P-AKI                 | Mild P-AKI | Severe P-AKI        |
| Charlson comorbidity index, median (IQR) | 1 (0, 3) | 2 (0, 5) <sup>a</sup> | 2 (0, 4) <sup>b</sup> | 3 (1, 6) <sup>c</sup> | 2 (0, 5) <sup>d</sup> | 2 (0, 5) <sup>e</sup>   | 4 (3, 6)                  | 3 (0, 5) <sup>g</sup> | 2 (0, 3)   | 3 (0, 5)            |
| Alcohol or drug abuse                    | 18 (6)   | 8 (8)                 | 4 (5)                 | 4 (21)                | 3 (4)                 | 3 (4)                   | 0 (0)                     | 5 (17)                | 1 (7)      | 4 (29) <sup>i</sup> |
| Myocardial Infarction                    | 14 (4)   | 5 (5)                 | 3 (4)                 | 2 (11)                | 4 (5)                 | 3 (4)                   | 1 (20)                    | 1 (3)                 | 0 (0)      | 1 (7)               |
| Congestive Heart Failure                 | 26 (8)   | 12 (12)               | 9 (11)                | 3 (16)                | 8 (11)                | 7 (10)                  | 1 (20)                    | 4 (14)                | 2 (13)     | 2 (14)              |
| Peripheral Vascular Disease              | 25 (8)   | 19 (18) <sup>a</sup>  | 15 (18) <sup>b</sup>  | 4 (21)                | 13 (17)               | 13 (19)                 | 0 (0)                     | 6 (21)                | 2 (13)     | 4 (29)              |
| Cerebrovascular Disease                  | 19 (6)   | 5 (5)                 | 3 (4)                 | 2 (11)                | 3 (4)                 | 3 (4)                   | 0 (0)                     | 2 (7)                 | 0 (0)      | 2 (14)              |
| Chronic Pulmonary Disease                | 68 (22)  | 32 (31)               | 23 (27)               | 9 (47)                | 22 (29)               | 18 (26)                 | 4 (80)                    | 10 (34)               | 5 (33)     | 5 (36)              |
| Cancer                                   | 43 (14)  | 23 (22)               | 18 (21)               | 5 (26)                | 17 (23)               | 15 (21)                 | 2 (40)                    | 6 (21)                | 3 (20)     | 3 (21)              |
| Metastatic Carcinoma                     | 11 (4)   | 9 (9)                 | 8 (9)                 | 1 (5)                 | 8 (11)                | 7 (10)                  | 1 (20)                    | 1 (3)                 | 1 (7)      | 0 (0)               |
| Liver Disease                            | 34 (11)  | 11 (11)               | 8 (9)                 | 3 (16)                | 7 (9)                 | 7 (10)                  | 0 (0)                     | 4 (14)                | 1 (7)      | 3 (21)              |
| Diabetes                                 | 63 (20)  | 29 (28)               | 26 (31)               | 3 (16)                | 21 (28)               | 20 (29)                 | 1 (20)                    | 8 (28)                | 6 (40)     | 2 (14)              |
| Hypertension                             | 33 (11)  | 19 (18) <sup>a</sup>  | 17 (20)               | 2 (11)                | 15 (20)               | 14 (20)                 | 1 (20)                    | 4 (14)                | 3 (20)     | 1 (7)               |
| Obesity                                  | 74 (24)  | 33 (32)               | 25 (29)               | 8 (42)                | 19 (25)               | 18 (26)                 | 1 (20)                    | 14 (48) <sup>g</sup>  | 7 (47)     | 7 (50)              |
| Fluid and electrolyte disorders          | 40 (13)  | 36 (35) <sup>a</sup>  | 28 (33) <sup>b</sup>  | 8 (42) <sup>c</sup>   | 24 (32) <sup>d</sup>  | 23 (33) <sup>e</sup>    | 1 (20)                    | 12 (41) <sup>g</sup>  | 5 (33)     | 7 (50) <sup>i</sup> |
| Valvular Disease                         | 15 (5)   | 15 (14)               | 9 (11)                | 6 (32) <sup>f</sup>   | 7 (9)                 | 7 (10)                  | 0 (0)                     | 8 (28) <sup>g</sup>   | 2 (13)     | 6 (43) <sup>i</sup> |
| Coagulopathy                             | 12 (4)   | 6 (6)                 | 3 (4)                 | 3 (16)                | 4 (5)                 | 3 (4)                   | 1 (20)                    | 2 (7)                 | 0 (0)      | 2 (14)              |
| Weight Loss                              | 19 (6)   | 16 (15) <sup>a</sup>  | 14 (16) <sup>b</sup>  | 2 (11)                | 12 (16) <sup>d</sup>  | 12 (17)                 | 0 (0)                     | 4 (14)                | 2 (13)     | 2 (14)              |
| Depression                               | 32 (10)  | 13 (12)               | 12 (14)               | 1 (5)                 | 10 (13)               | 10 (14)                 | 0 (0)                     | 3 (10)                | 2 (13)     | 1 (7)               |
| Chronic anemia                           | 14 (4)   | 13 (12) <sup>a</sup>  | 11 (13) <sup>b</sup>  | 2 (11)                | 8 (11)                | 8 (11)                  | 0 (0)                     | 5 (17) <sup>g</sup>   | 3 (20)     | 2 (14)              |
| Chronic Kidney Disease                   | 76 (24)  | 46 (44) <sup>a</sup>  | 38 (45) <sup>b</sup>  | 8 (42)                | 34 (45) <sup>d</sup>  | 31 (44) <sup>e</sup>    | 3 (60)                    | 12 (41)               | 7 (47)     | 5 (36)              |

<sup>a</sup>: Bonferroni adjusted p-value  $\leq 0.05$  for AKI vs No AKI comparison.

<sup>b</sup>: Bonferroni adjusted p-value  $\leq 0.05$  for AKI Stage 1 vs No AKI comparison.

<sup>c</sup>: Bonferroni adjusted p-value  $\leq 0.05$  for AKI Stage 2+ vs No AKI comparison.

<sup>d</sup>: Bonferroni adjusted p-values  $\leq 0.05$  for Rapidly Reversed AKI vs No AKI comparison.

<sup>e</sup>: Bonferroni adjusted p-values  $\leq 0.05$  for Mild Rapidly Reversed AKI vs No AKI comparison.

<sup>f</sup>: Bonferroni adjusted p-values  $\leq 0.05$  for Severe Rapidly Reversed AKI vs No AKI comparison.

<sup>g</sup>: Bonferroni adjusted p-values  $\leq 0.05$  for P-AKI vs No AKI comparison.

<sup>h</sup>: Bonferroni adjusted p-values  $\leq 0.05$  Mild P-AKI vs No AKI comparison.

<sup>i</sup>: Bonferroni adjusted p-values  $\leq 0.05$  for Severe P-AKI vs No AKI comparison.

Abbreviations: AKI, Acute kidney injury; P-AKI, Persistent acute kidney injury.

**Table S3.** Preoperative medication exposures within 30 days of surgery with regard to AKI.

|                                             |          |                      | AKI                  |              |                      | Rapidly Reversed AKI    |                           |         | P-AKI      |              |
|---------------------------------------------|----------|----------------------|----------------------|--------------|----------------------|-------------------------|---------------------------|---------|------------|--------------|
|                                             | No AKI   | AKI                  | AKI Stage 1          | AKI Stage 2+ | Rapid Reversed AKI   | Mild Rapid Reversed AKI | Severe Rapid Reversed AKI | P-AKI   | Mild P-AKI | Severe P-AKI |
| Aminoglycosides, n (%)                      | 109 (35) | 35 (34)              | 30 (35)              | 5 (26)       | 28 (37)              | 26 (37)                 | 2 (40)                    | 7 (24)  | 4 (27)     | 3 (21)       |
| Analgesics, n (%)                           | 204 (65) | 67 (64)              | 55 (65)              | 12 (63)      | 49 (65)              | 46 (66)                 | 3 (60)                    | 18 (62) | 9 (60)     | 9 (64)       |
| Angiotensins, n (%)                         | 15 (5)   | 6 (6)                | 6 (7)                | 0 (0)        | 5 (7)                | 5 (7)                   | 0 (0)                     | 1 (3)   | 1 (7)      | 0 (0)        |
| Antifungals, n (%)                          | 42 (13)  | 24 (23) <sup>a</sup> | 20 (24)              | 4 (21)       | 17 (23)              | 17 (24)                 | 0 (0)                     | 7 (24)  | 3 (20)     | 4 (29)       |
| Beta Blockers, n (%)                        | 57 (18)  | 25 (24)              | 23 (27)              | 2 (11)       | 20 (27)              | 20 (29)                 | 0 (0)                     | 5 (17)  | 3 (20)     | 2 (14)       |
| Beta Lactams, n (%)                         | 13 (4)   | 4 (4)                | 4 (5)                | 0 (0)        | 3 (4)                | 3 (4)                   | 0 (0)                     | 1 (3)   | 1 (7)      | 0 (0)        |
| Cephalosporins, n (%)                       | 88 (28)  | 34 (33)              | 27 (32)              | 7 (37)       | 21 (28)              | 20 (29)                 | 1 (20)                    | 13 (45) | 7 (47)     | 6 (43)       |
| Corticosteroids, n (%)                      | 40 (13)  | 27 (26) <sup>a</sup> | 22 (26) <sup>b</sup> | 5 (26)       | 20 (27) <sup>d</sup> | 20 (29) <sup>e</sup>    | 0 (0)                     | 7 (24)  | 2 (13)     | 5 (36)       |
| Diuretics, n (%)                            | 43 (14)  | 14 (13)              | 10 (12)              | 4 (21)       | 9 (12)               | 9 (13)                  | 0 (0)                     | 5 (17)  | 1 (7)      | 4 (29)       |
| Fluoroquinolones, n (%)                     | 13 (4)   | 4 (4)                | 4 (5)                | 0 (0)        | 3 (4)                | 3 (4)                   | 0 (0)                     | 1 (3)   | 1 (7)      | 0 (0)        |
| Heparins, n (%)                             | 112 (36) | 46 (44)              | 38 (45)              | 8 (42)       | 33 (44)              | 31 (44)                 | 2 (40)                    | 13 (45) | 7 (47)     | 6 (43)       |
| Nonsteroidal anti-inflammatory drugs, n (%) | 59 (19)  | 15 (14)              | 12 (14)              | 3 (16)       | 10 (13)              | 10 (14)                 | 0 (0)                     | 5 (17)  | 2 (13)     | 3 (21)       |
| Salicylates, n (%)                          | 35 (11)  | 9 (9)                | 7 (8)                | 2 (11)       | 7 (9)                | 5 (7)                   | 2 (40)                    | 2 (7)   | 2 (13)     | 0 (0)        |
| Statins, n (%)                              | 13 (4)   | 4 (4)                | 4 (5)                | 0 (0)        | 3 (4)                | 3 (4)                   | 0 (0)                     | 1 (3)   | 1 (7)      | 0 (0)        |
| Penicillins, n (%)                          | 127 (41) | 38 (37)              | 34 (40)              | 4 (21)       | 30 (40)              | 27 (39)                 | 3 (60)                    | 8 (28)  | 7 (47)     | 1 (7)        |
| Vasopressors, n (%)                         | 74 (24)  | 20 (19)              | 16 (19)              | 4 (21)       | 15 (20)              | 14 (20)                 | 1 (20)                    | 5 (17)  | 2 (13)     | 3 (21)       |

<sup>a</sup>: Bonferroni adjusted p-value  $\leq 0.05$  for AKI vs No AKI comparison.

<sup>b</sup>: Bonferroni adjusted p-value  $\leq 0.05$  for AKI Stage 1 vs No AKI comparison.

<sup>c</sup>: Bonferroni adjusted p-value  $\leq 0.05$  for AKI Stage 2+ vs No AKI comparison.

<sup>d</sup>: Bonferroni adjusted p-values  $\leq 0.05$  for Rapidly Reversed AKI vs No AKI comparison.

<sup>e</sup>: Bonferroni adjusted p-values  $\leq 0.05$  for Mild Rapidly Reversed AKI vs No AKI comparison.

<sup>f</sup>: Bonferroni adjusted p-values  $\leq 0.05$  for Severe Rapidly Reversed AKI vs No AKI comparison.

<sup>g</sup>: Bonferroni adjusted p-values  $\leq 0.05$  for P-AKI vs No AKI comparison.

<sup>h</sup>: Bonferroni adjusted p-values  $\leq 0.05$  Mild P-AKI vs No AKI comparison.

<sup>i</sup>: Bonferroni adjusted p-values  $\leq 0.05$  for Severe P-AKI vs No AKI comparison.

Abbreviations: AKI, Acute kidney injury; P-AKI, Persistent acute kidney injury.

**Table S4.** Univariate odds ratios tables for AKI stages and trajectories.

|                                                | No AKI vs AKI     |         | Stage 1 AKI vs Stage 2+ AKI |         | Rapidly Reversed AKI vs P-AKI |         |
|------------------------------------------------|-------------------|---------|-----------------------------|---------|-------------------------------|---------|
|                                                | OR (95% CI)       | p-value | OR (95% CI)                 | p-value | OR (95% CI)                   | p-value |
| Sex (Reference: Female)                        |                   |         |                             |         |                               |         |
| Male                                           | 0.99 (0.64, 1.55) | >0.9    | 2.44 (0.88, 7.50)           | 0.10    | 0.86 (0.36, 2.04)             | 0.7     |
| Race (Reference: White)                        |                   |         |                             |         |                               |         |
| African-American                               | 1.57 (0.77, 3.12) | 0.2     | 0.72 (0.11, 3.03)           | 0.7     | 0.99 (0.25, 3.30)             | >0.9    |
| Other                                          | 0.55 (0.25, 1.09) | 0.11    | 1.08 (0.15, 4.89)           | >0.9    | 0.62 (0.09, 2.71)             | 0.6     |
| Ethnicity (Reference: Non-Hispanic)            |                   |         |                             |         |                               |         |
| Hispanic                                       | 0.95 (0.34, 2.31) | >0.9    | 1.08 (0.15, 4.89)           | >0.9    | 0.50 (0.03, 3.29)             | 0.5     |
| Payer (Reference: Medicaid)                    |                   |         |                             |         |                               |         |
| Medicare                                       | 2.43 (1.24, 5.09) | 0.013   | NA                          | NA      | 1.09 (0.28, 5.37)             | >0.9    |
| Private                                        | 0.95 (0.45, 2.08) | 0.9     | NA                          | NA      | 1.11 (0.24, 6.05)             | >0.9    |
| Uninsured                                      | 0.88 (0.28, 2.52) | 0.8     | NA                          | NA      | 3.00 (0.38, 26.5)             | 0.3     |
| Marital Status (Reference: Single)             |                   |         |                             |         |                               |         |
| Divorced                                       | 1.65 (0.82, 3.26) | 0.2     | 0.23 (0.01, 1.40)           | 0.20    | 0.31 (0.06, 1.17)             | 0.11    |
| Married                                        | 1.08 (0.67, 1.77) | 0.7     | 0.91 (0.32, 2.64)           | 0.9     | 0.41 (0.16, 1.05)             | 0.065   |
| Admission emergency (Reference: Non-emergency) |                   |         |                             |         |                               |         |
| Emergency                                      | 1.34 (0.59, 2.85) | 0.5     | 2.09 (0.42, 8.44)           | 0.3     | 4.63 (1.22, 19.5)             | 0.026   |
| Smoking status (Reference: Never)              |                   |         |                             |         |                               |         |
| Current                                        | 0.93 (0.50, 1.70) | 0.8     | 0.18 (0.01, 1.04)           | 0.11    | 0.71 (0.18, 2.41)             | 0.6     |
| Former                                         | 1.64 (0.99, 2.72) | 0.056   | 0.60 (0.19, 1.73)           | 0.4     | 1.06 (0.41, 2.70)             | >0.9    |
| Rural (Reference: Urban)                       | 0.68 (0.41, 1.11) | 0.13    | 2.53 (0.87, 7.18)           | 0.082   | 1.12 (0.41, 2.89)             | 0.8     |
| CPT 50081 (Reference: 50080)                   | 0.75 (0.35, 1.69) | 0.5     | 0.88 (0.20, 6.20)           | 0.9     | 3.82 (0.67, 72.1)             | 0.2     |
| Alcohol or drug abuse<br>(Reference: No)       | 1.37 (0.55, 3.14) | 0.5     | 5.40 (1.16, 25.2)           | 0.027   | 5.00 (1.14, 25.9)             | 0.036   |
| Myocardial Infarction<br>(Reference: No)       | 1.08 (0.34, 2.90) | 0.9     | 3.22 (0.40, 20.9)           | 0.2     | 0.63 (0.03, 4.52)             | 0.7     |
| Congestive Heart Failure<br>(Reference: No)    | 1.44 (0.68, 2.91) | 0.3     | 3.22 (0.40, 20.9)           | 0.5     | 1.34 (0.33, 4.66)             | 0.7     |
| Peripheral Vascular Disease<br>(Reference: No) | 2.58 (1.34, 4.89) | 0.004   | 1.24 (0.32, 4.02)           | 0.7     | 1.24 (0.40, 3.56)             | 0.7     |
| Cerebrovascular Disease<br>(Reference: No)     | 0.78 (0.25, 2.00) | 0.6     | 3.22 (0.40, 20.9)           | 0.2     | 1.78 (0.22, 11.3)             | 0.5     |
| Chronic Pulmonary Disease<br>(Reference: No)   | 1.60 (0.97, 2.62) | 0.063   | 2.43 (0.86, 6.79)           | 0.088   | 1.27 (0.50, 3.13)             | 0.6     |
| Cancer (Reference: No)                         | 1.78 (1.00, 3.11) | 0.044   | 1.33 (0.39, 4.01)           | 0.6     | 0.89 (0.29, 2.45)             | 0.8     |
| Metastatic Carcinoma<br>(Reference: No)        | 2.60 (1.02, 6.47) | 0.040   | 1.33 (0.39, 4.01)           | 0.6     | 0.30 (0.02, 1.74)             | 0.3     |
| Liver Disease (Reference: No)                  | 0.97 (0.45, 1.94) | >0.9    | 1.80 (0.37, 7.04)           | 0.4     | 1.55 (0.38, 5.61)             | 0.5     |
| Diabetes (Reference: No)                       | 1.53 (0.91, 2.54) | 0.10    | 0.43 (0.09, 1.42)           | 0.2     | 0.98 (0.36, 2.50)             | >0.9    |
| Hypertension (Reference: No)                   | 1.90 (1.01, 3.48) | 0.041   | 0.47 (0.07, 1.86)           | 0.3     | 0.64 (0.17, 1.97)             | 0.5     |
| Obesity (Reference: No)                        | 1.50 (0.91, 2.44) | 0.10    | 0.47 (0.07, 1.86)           | 0.3     | 2.75 (1.12, 6.81)             | 0.027   |

|                                                      |                   |        |                   |       |                   |       |
|------------------------------------------------------|-------------------|--------|-------------------|-------|-------------------|-------|
| Fluid and electrolyte disorders (Reference: No)      | 3.61 (2.14, 6.11) | <0.001 | 1.48 (0.52, 4.08) | 0.4   | 1.50 (0.61, 3.63) | 0.4   |
| Valvular Disease (Reference: No)                     | 3.35 (1.57, 7.17) | 0.002  | 3.90 (1.14, 12.8) | 0.025 | 1.31 (0.18, 7.15) | 0.8   |
| Coagulopathy (Reference: No)                         | 1.54 (0.52, 4.07) | 0.4    | 5.12 (0.88, 30.0) | 0.058 | 0.84 (0.22, 2.68) | 0.8   |
| Weight Loss (Reference: No)                          | 2.81 (1.37, 5.70) | 0.004  | 0.60 (0.09, 2.41) | 0.5   | 0.75 (0.16, 2.69) | 0.7   |
| Depression (Reference: No)                           | 1.25 (0.61, 2.44) | 0.5    | 0.34 (0.02, 1.89) | 0.3   | 1.74 (0.49, 5.76) | 0.4   |
| Chronic anemia (Reference: No)                       | 3.05 (1.37, 6.76) | 0.006  | 0.79 (0.12, 3.31) | 0.8   | 2.14 (0.90, 5.18) | 0.087 |
| Chronic Kidney Disease (Reference: No)               | 2.47(1.55, 3.94)  | <0.001 | 0.90 (0.32, 2.45) | 0.8   | 0.85 (0.35, 2.02) | 0.7   |
| Night admission (Reference: No)                      | 0.99 (0.63, 1.56) | >0.9   | 0.79 (0.12, 3.31) | 0.9   | 2.14 (0.90, 5.18) | 0.087 |
| Aminoglycosides (Reference: No)                      | 0.99 (0.61, 1.59) | >0.9   | 0.79 (0.12, 3.31) | 0.3   | 0.47 (0.17, 1.19) | 0.13  |
| Analgesics (Reference: No)                           | 1.06 (0.65, 1.74) | 0.8    | 0.29 (0.04, 1.11) | 0.6   | 0.67 (0.27, 1.69) | 0.4   |
| Angiotensins (Reference: No)                         | 1.26 (0.44, 3.19) | 0.6    | NA                | NA    | 0.46 (0.02, 3.01) | 0.5   |
| Antifungals (Reference: No)                          | 2.02 (1.14, 3.54) | 0.014  | 0.29 (0.04, 1.11) | 0.7   | 0.97 (0.34, 2.61) | >0.9  |
| Beta Blockers (Reference: No)                        | 1.48 (0.86, 2.52) | 0.2    | 0.29 (0.04, 1.11) | 0.11  | 0.51 (0.16, 1.44) | 0.2   |
| Beta Lactams (Reference: No)                         | 0.95 (0.26, 2.77) | >0.9   | NA                | NA    | 0.79 (0.04, 6.44) | 0.8   |
| Cephalosporins (Reference: No)                       | 1.30 (0.80, 2.11) | 0.3    | 1.12 (0.38, 3.13) | 0.8   | 1.86 (0.76, 4.56) | 0.2   |
| Corticosteroids (Reference: No)                      | 2.51 (1.43, 4.36) | 0.001  | 0.93 (0.27, 2.75) | 0.9   | 0.78 (0.27, 2.05) | 0.6   |
| Diuretics (Reference: No)                            | 0.98 (0.50, 1.83) | >0.9   | 2.00 (0.50, 6.91) | 0.3   | 1.53 (0.43, 4.90) | 0.5   |
| Fluoroquinolones (Reference: No)                     | 0.95 (0.26, 2.77) | >0.9   | NA                | NA    | 0.79 (0.04, 6.44) | 0.8   |
| Heparins (Reference: No)                             | 1.52 (0.96, 2.40) | 0.076  | 0.78 (0.28, 2.15) | 0.6   | 0.89 (0.37, 2.12) | 0.8   |
| Nonsteroidal anti-inflammatory drugs (Reference: No) | 0.75 (0.39, 1.36) | 0.4    | 1.05 (0.22, 3.78) | >0.9  | 1.23 (0.35, 3.85) | 0.7   |
| Salicylates (Reference: No)                          | 0.78 (0.34, 1.61) | 0.5    | 1.05 (0.22, 3.78) | 0.8   | 0.66 (0.09, 2.93) | 0.6   |
| Statins (Reference: No)                              | 0.95 (0.26, 2.77) | >0.9   | NA                | NA    | 0.79 (0.04, 6.44) | 0.8   |
| Penicillins (Reference: No)                          | 0.88 (0.55, 1.40) | 0.6    | 0.35 0.09, 1.07   | 0.086 | 0.50 (0.18, 1.24) | 0.14  |
| Vasopressors (Reference: No)                         | 0.80 (0.45, 1.37) | 0.4    | 1.05 (0.22, 3.78) | >0.9  | 0.75 (0.22, 2.19) | 0.6   |

Abbreviations: AKI, Acute kidney injury; CI, Confidence Interval; P-AKI, Persistent acute kidney injury.

**Table S5.** Univariate analysis for hospital length of stay.

|                                                 | Estimate (95% CI)    | Standard Error | p-value |
|-------------------------------------------------|----------------------|----------------|---------|
| Sex (Reference: Female)                         |                      |                |         |
| Male                                            | -0.61 (-1.59, 0.36)  | 0.5            | 0.22    |
| Age                                             | 0.01 (-0.03, 0.04)   | 0.02           | 0.72    |
| BMI                                             | 0.03 (-0.03, 0.08)   | 0.03           | 0.31    |
| Charlson Comorbidity Index                      | 0.35 (0.16, 0.53)    | 0.09           | 0       |
| Race (Reference: White)                         |                      |                |         |
| African-American                                | 0.17 (-1.49, 1.83)   | 0.85           | 0.84    |
| Other                                           | -1.79 (-3.15, -0.42) | 0.7            | 0.01    |
| Payer (Reference: Medicaid)                     |                      |                |         |
| Medicare                                        | 0.57 (-0.85, 1.99)   | 0.72           | 0.43    |
| Private                                         | -1.88 (-3.33, -0.43) | 0.74           | 0.01    |
| Uninsured                                       | -1.41 (-3.44, 0.61)  | 1.03           | 0.17    |
| Ethnicity (Reference: Non-Hispanic)             |                      |                |         |
| Hispanic                                        | -0.07 (-2.12, 1.98)  | 1.05           | 0.95    |
| Marital Status (Reference: Single)              |                      |                |         |
| Divorced                                        | 1.27 (-0.31, 2.85)   | 0.81           | 0.11    |
| Married                                         | -1.33 (-2.37, -0.29) | 0.53           | 0.01    |
| Missing                                         | -1.68 (-6.14, 2.78)  | 2.27           | 0.46    |
| Admission emergency (Reference: Non-emergency)  |                      |                |         |
| Emergency                                       | 6.57 (4.88, 8.27)    | 0.86           | 0       |
| Smoking Status (Reference: Never)               |                      |                |         |
| Current                                         | 0.03 (-1.26, 1.31)   | 0.66           | 0.97    |
| Former                                          | 1.15 (-0.01, 2.3)    | 0.59           | 0.05    |
| Missing                                         | 0.18 (-3.64, 3.99)   | 1.95           | 0.93    |
| Alcohol or drug abuse (Reference: No)           | 4.56 (2.59, 6.53)    | 1              | 0       |
| Congestive Heart Failure (Reference: No)        | 0.09 (-2.25, 2.43)   | 1.19           | 0.94    |
| Cerebrovascular Disease (Reference: No)         | 1.72 (0.03, 3.41)    | 0.86           | 0.05    |
| Cancer (Reference: No)                          | 2.96 (1.4, 4.53)     | 0.8            | 0       |
| Liver Disease (Reference: No)                   | 2.19 (0.1, 4.27)     | 1.06           | 0.04    |
| Hypertension (Reference: No)                    | 1.33 (0.2, 2.46)     | 0.58           | 0.02    |
| Fluid and electrolyte disorders (Reference: No) | -1.25 (-2.58, 0.08)  | 0.68           | 0.07    |
| Coagulopathy (Reference: No)                    | -1.45 (-3.73, 0.83)  | 1.16           | 0.21    |
| Depression (Reference: No))                     | 1.2 (-0.37, 2.76)    | 0.8            | 0.13    |
| Chronic Kidney Disease (Reference: No)          | 0.93 (-0.24, 2.1)    | 0.6            | 0.12    |
| Myocardial Infarction (Reference: No)           | 1.07 (-0.4, 2.54)    | 0.75           | 0.16    |
| Peripheral Vascular Disease (Reference: No)     | 1.95 (0.85, 3.05)    | 0.56           | 0       |
| Chronic Pulmonary Disease (Reference: No)       | 4.69 (3.51, 5.87)    | 0.6            | 0       |
| Metastatic Carcinoma (Reference: No)            | 6.81 (5.05, 8.58)    | 0.9            | 0       |
| Diabetes (Reference: No)                        | 3.11 (0.73, 5.49)    | 1.21           | 0.01    |
| Obesity (Reference: No)                         | 2.84 (1.1, 4.57)     | 0.89           | 0       |
| Valvular Disease (Reference: No)                | 2.21 (0.65, 3.76)    | 0.79           | 0.01    |
| Weight Loss (Reference: No)                     | 5.2 (3.28, 7.12)     | 0.98           | 0       |
| Chronic anemia (Reference: No)                  | 1.31 (0.25, 2.38)    | 0.54           | 0.02    |
| AKI                                             |                      |                |         |
| AKI vs No AKI                                   | 4.83 (3.8, 5.86)     | 0.52           | 0       |

|                        |                      |      |   |
|------------------------|----------------------|------|---|
| Worst AKI Stage        |                      |      |   |
| AKI Stage 1 vs No AKI  | 3.5 (2.5, 4.5)       | 0.51 | 0 |
| AKI Stage 2 vs No AKI  | 6.66 (4.43, 8.88)    | 1.14 | 0 |
| AKI Stage 3 vs No AKI  | 22.31 (18.63, 25.99) | 1.88 | 0 |
| CPT (Reference: 50080) |                      |      |   |
| 50081                  | 0.35 (0.16, 0.53)    | 0.09 | 0 |

Abbreviations: AKI, Acute kidney injury; CI, Confidence Interval; P-AKI, Persistent acute kidney injury.



**TableS6.** Odds ratios for the adjusted logistic regression model for AKI.

|                            | Odds Ratio (95% CI) | p-value |
|----------------------------|---------------------|---------|
| Age                        | 1.02 (1.00, 1.04)   | 0.014   |
| Charlson Comorbidity Index | 1.08 (0.98, 1.20)   | 0.13    |
| Chronic Kidney Disease     |                     |         |
| No                         | —                   |         |
| Yes                        | 1.75 (0.96, 3.18)   | 0.066   |
| Race                       |                     |         |
| White                      | —                   |         |
| White vs African-American  | 1.34 (0.59, 2.93)   | 0.5     |
| White vs Other             | 0.38 (0.15, 0.85)   | 00.028  |
| Corticosteroid             |                     |         |
| No                         | —                   |         |
| Yes                        | 3.19 (1.72, 5.94)   | <0.001  |

Abbreviations: CI, Confidence Interval.

**Table S7.** Outcomes of hospital length of stay regression model.

|                            | <b>Beta</b>         | <b>p-value</b> |
|----------------------------|---------------------|----------------|
| Age                        | -0.02 (-0.05, 0.01) | 0.3            |
| Sex                        |                     |                |
| Female                     | -                   |                |
| Male                       | -0.65 (-1.6, 0.27)  | 0.2            |
| Race                       |                     |                |
| White                      | -                   |                |
| African-American           | -0.63 (-2.2, 0.94)  | 0.4            |
| Other                      | -1.2 (-2.4, 0.13)   | 0.08           |
| Body mass index            | 0.01 ( -0.04, 0.06) | 0.8            |
| Charlson Comorbidity Index | 0.24 (0.03, 0.45)   | 0.023          |
| Chronic Kidney Disease     |                     |                |
| No                         | -                   |                |
| Yes                        | -0.26 (1.5, 0.94)   | 0.7            |
| AKI                        |                     |                |
| No                         | -                   |                |
| Yes                        | 4.9 (3.8, 5.9)      | <0.001         |

Abbreviations: AKI, Acute kidney injury.

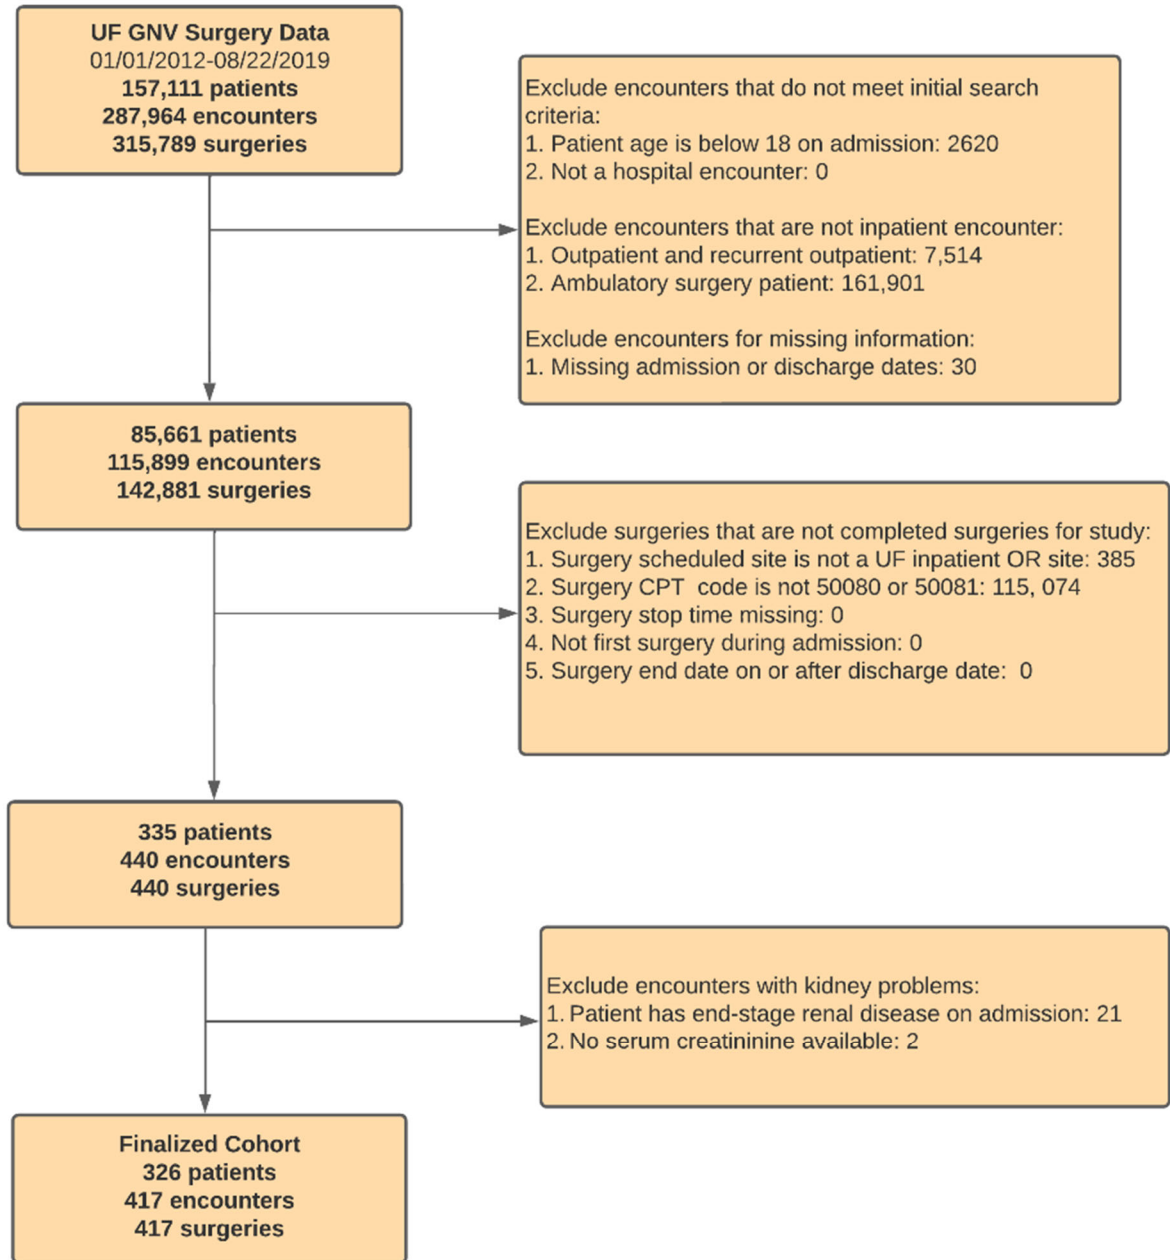

**Figure S1.** Cohort derivation.
